# Supplementary material for: Synthesis and Characterization of Holmium-Doped Iron Oxide Nanoparticles
Source: PubMed Central journal article supplement (PMC5453075; doi:10.3390/ma7021155), 2014-02-12

## Supporting Information

**Table S1.** Diameter of the nanoparticles measured by transmission electron microscopy.

| Sample name                            | Nominal holmium content (%) | Diameter (nm) |
|----------------------------------------|-----------------------------|---------------|
| Fe <sub>3</sub> O <sub>4</sub>         | 0                           | 7.24 ± 1.0    |
| Fe <sub>3</sub> O <sub>4</sub> -1.25Ho | 1.25                        | 14.7 ± 1.7    |
| Fe <sub>3</sub> O <sub>4</sub> -2.5Ho  | 2.5                         | 11.7 ± 1.0    |
| Fe <sub>3</sub> O <sub>4</sub> -5Ho    | 5                           | 8.3 ± 0.7     |
| Fe <sub>3</sub> O <sub>4</sub> -10Ho   | 10                          | 10.2 ± 0.8    |

**Figure S1.** Transmission electron microscopy images of all different nanoparticle samples.

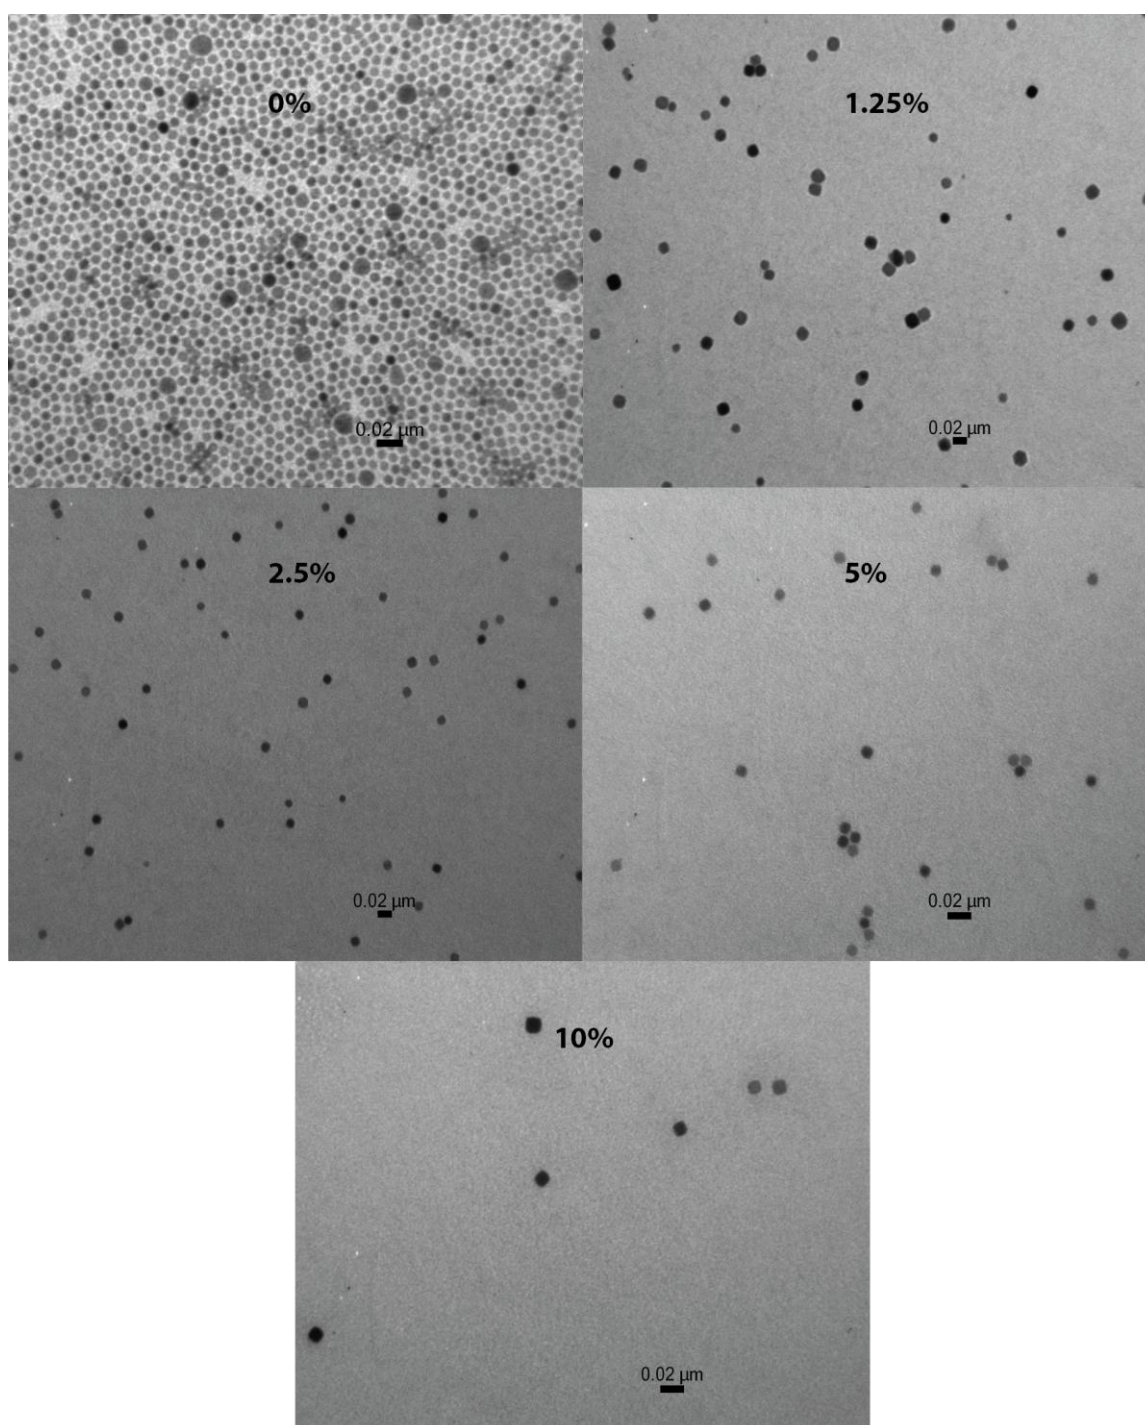

**Figure S2.** XRD diffraction spectra of the different Ho-doped nanoparticles. The crystal lattice planes are shown next to the corresponding peaks.

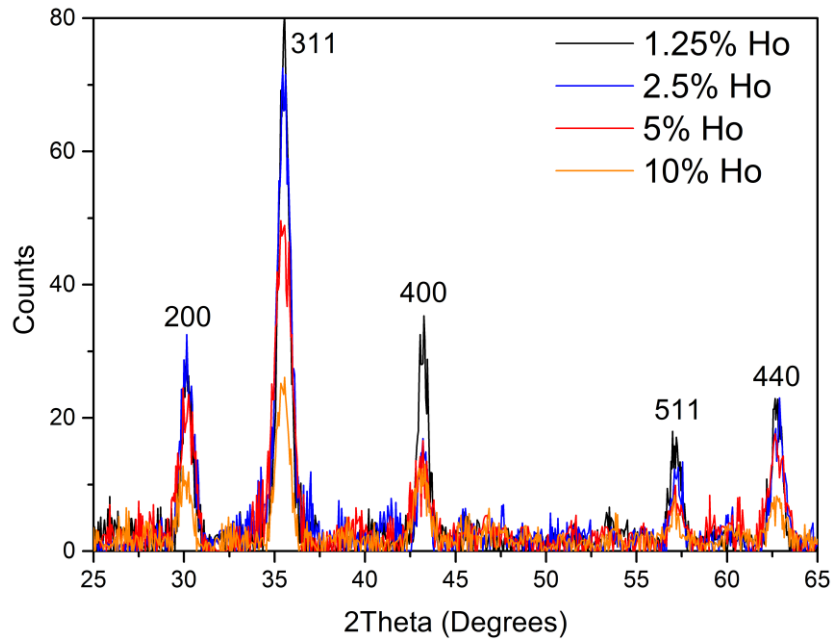

**Figure S3.** Comparison of the XRD spectra of  $\text{Ho}_2\text{O}_3$  (COD REV22182 96-210-1513) (red drop-lines) and the 10% Ho-doped sample. No overlap is visible, indicating that no islands of  $\text{Ho}_2\text{O}_3$  are formed within the nanoparticles. It is possible that pure  $\text{Ho}_2\text{O}_3$  particles are formed during the synthesis, but these are washed away during the magnetic purification process.

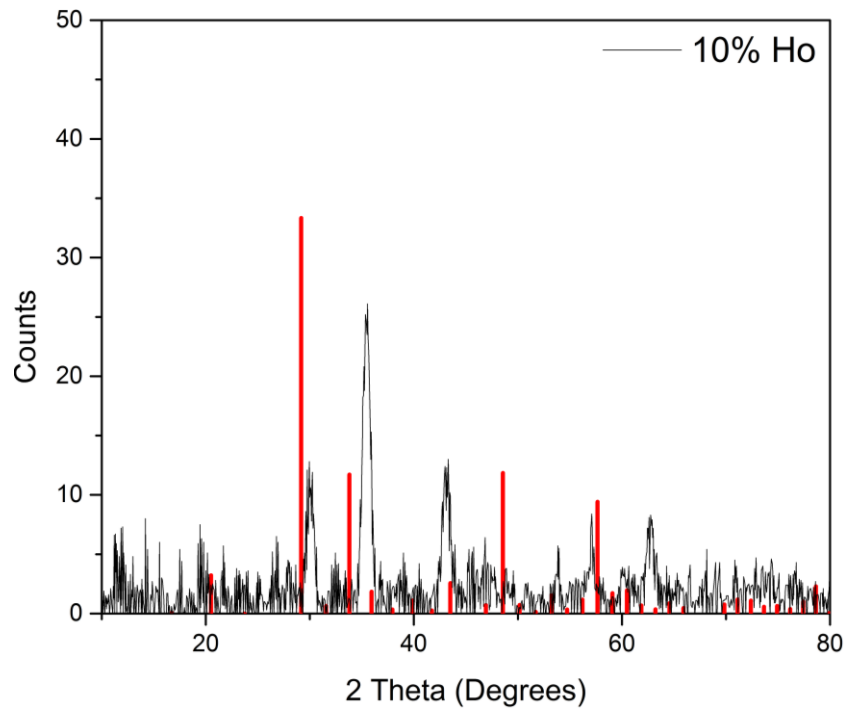

**Figure S4.** Faraday rotation of the holmium-containing nanoparticles, measured in solution (2.5 mg/mL).

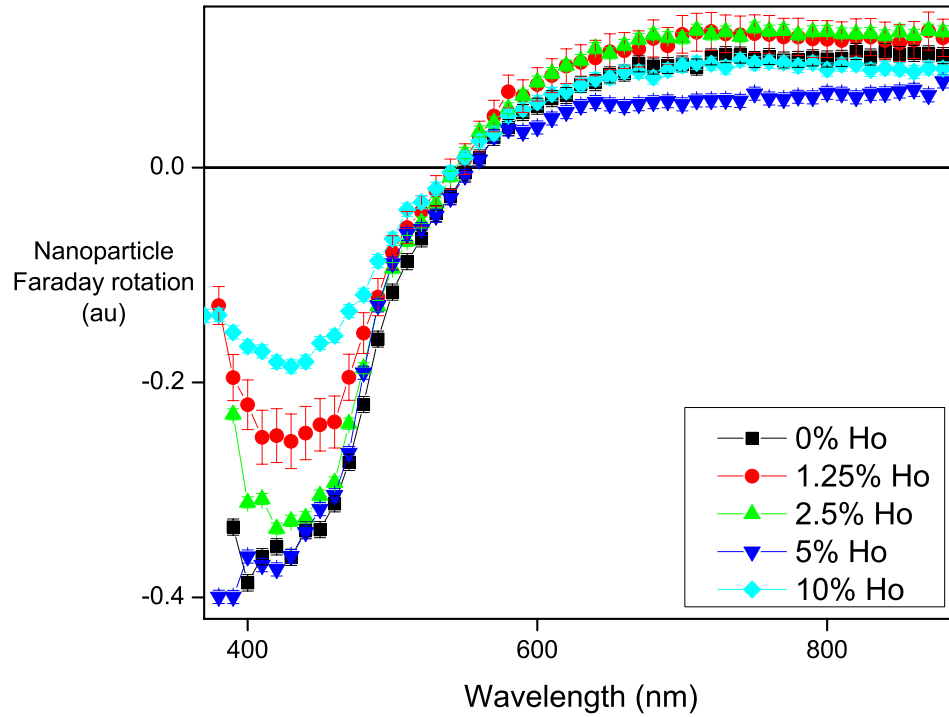

**Figure S5.** Faraday rotation of the holmium-containing nanoparticles, measured in a thin film. The polymethylmethacrylate film contained 10 mass% particles.

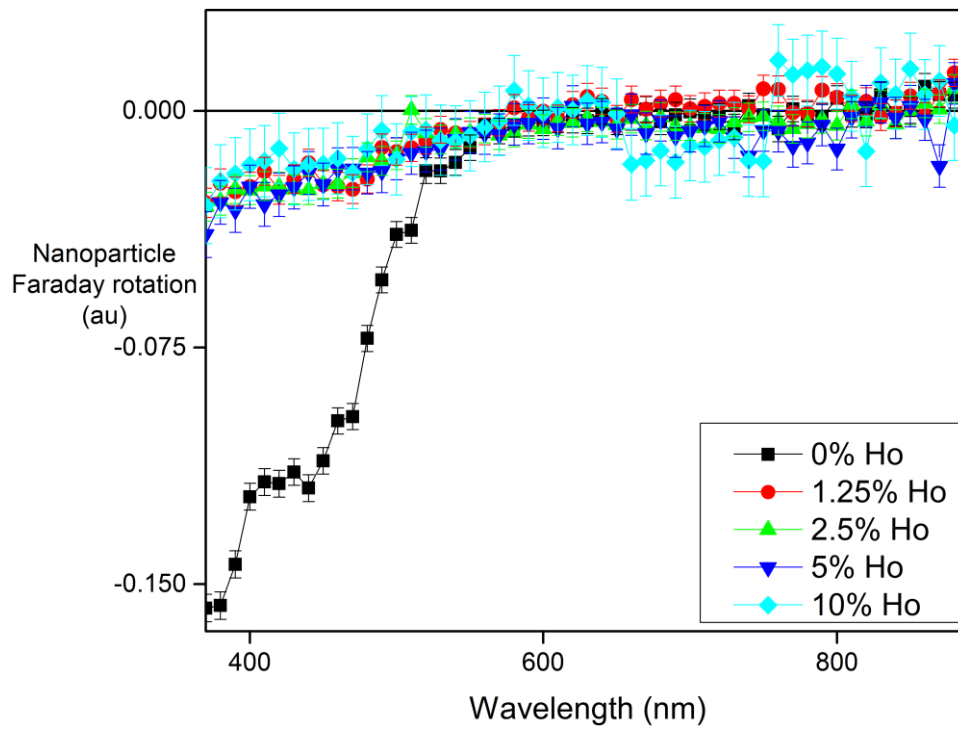

**Figure S6.** Fluorescence spectra of all nanoparticle samples measured in solution (5 mg/mL, excited at 480 nm). **(a)** 0% Ho; **(b)** 1.25% Ho; **(c)** 2.5% Ho and **(d)** 10% Ho.

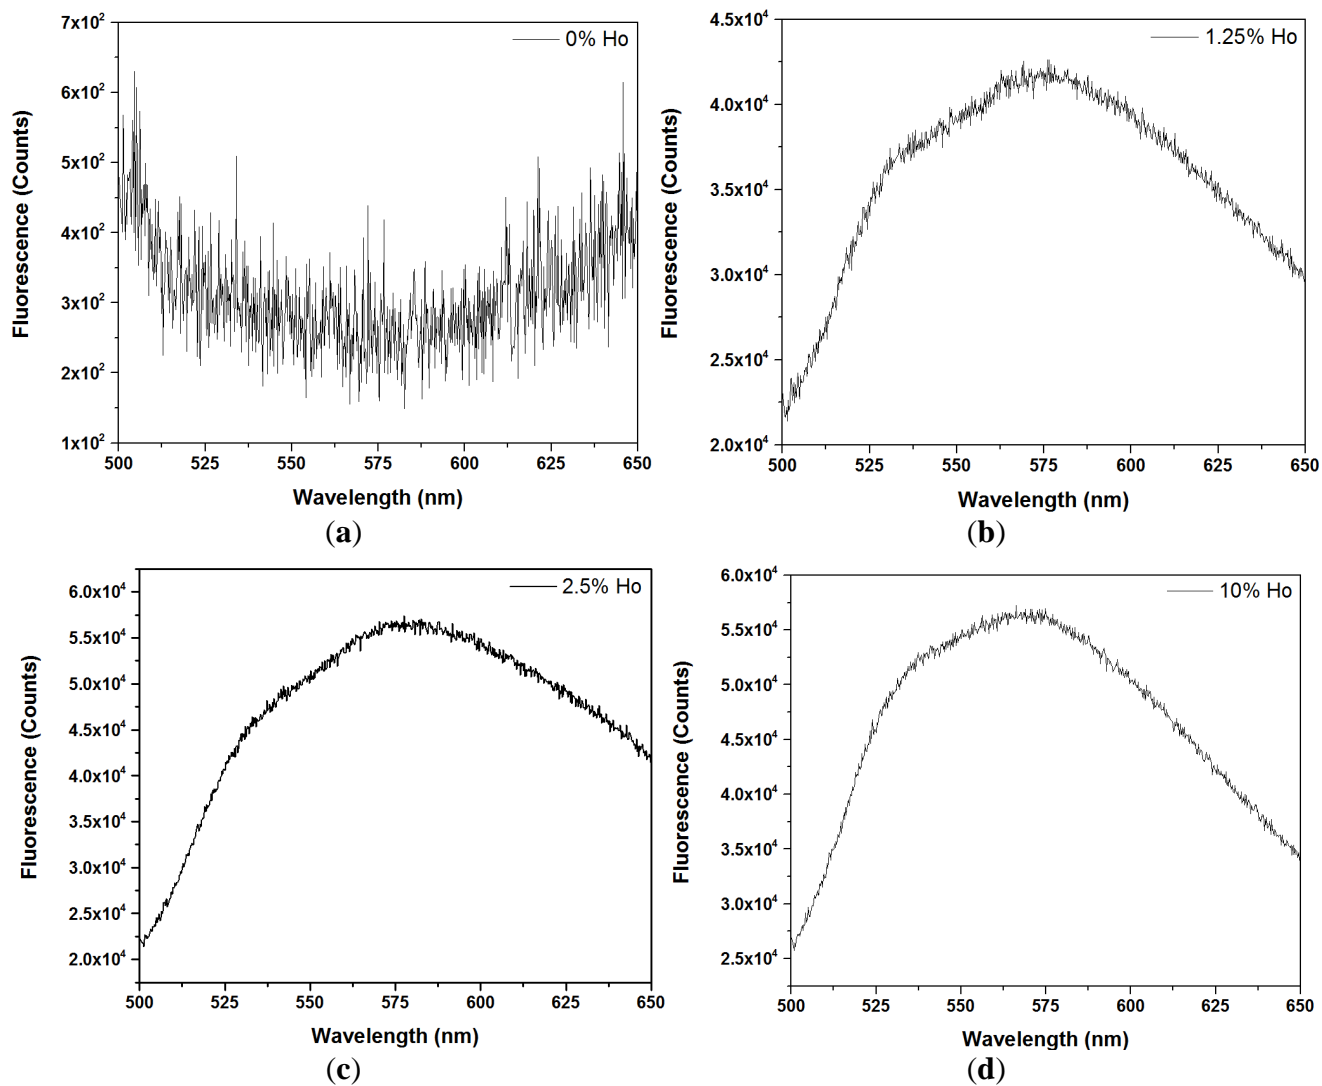

Supplement: materials-07-01155-s001.pdf [file materials-07-01155-s001.pdf]
